# Supplementary material for: Semi-Automated High-Throughput Substrate Screening Assay for Nucleoside Kinases
Source: MDPI journal article supplement (doi:10.3390/ijms222111558), 2021-10-26
Supplement: s1 [file s1]

|                                                                                                                                                     |    |
|-----------------------------------------------------------------------------------------------------------------------------------------------------|----|
| Author contributions                                                                                                                                | 1  |
| Data availability                                                                                                                                   | 1  |
| Autoluminescence and luciferase inhibition test with mixed ATP and nucleoside/NMP standards                                                         | 2  |
| Mixed ATP/AMP standards                                                                                                                             | 3  |
| HPLC chromatograms for <i>HsdCK</i> -catalyzed reactions with natural substrates                                                                    | 4  |
| Comparison of HPLC and the luminescent assay for the determination of ATP consumption and (deoxy)NMP formation in <i>HsdCK</i> -catalysed reactions | 5  |
| Semi-automated substrate screening assay for nucleoside kinases.                                                                                    | 6  |
| Assay protocol                                                                                                                                      | 7  |
| Accuracy of the NK activity assay                                                                                                                   | 8  |
| Activities of four (deoxy)nucleoside kinases with 20 natural and modified nucleoside substrates                                                     | 9  |
| Typical retention times for the HPLC analysis                                                                                                       | 10 |
| References                                                                                                                                          | 11 |

### Author Contributions (with definitions as recommended by Brand *et al.*<sup>[1]</sup>)

Conceptualization, K.F.H., M.F., P.N. and A.K.; Formal analysis, K.F.H. and M.F.; Funding acquisition, P.N. and A.K.; Investigation, K.F.H. and M.F.; Methodology, K.F.H. and M.F.; Project administration, K.F.H., M.F., P.N. and A.K.; Resources, P.N. and A.K.; Software, K.F.H. and S.H.; Supervision, P.N. and A.K.; Validation, K.F.H. and M.F.; Visualization, K.F.H., M.F. and A.K.; Writing – original draft, K.F.H. and M.F.; Writing – review & editing, K.F.H., M.F., S.H., P.N. and A.K.

All authors have read and agree to the published version of the manuscript.

### Data availability

All data depicted visually in the items in the main text as well as in the Supplementary Material is available from an externally hosted Supporting Information.<sup>[2]</sup>

**Table S1.** Autoluminescence and luciferase inhibition test with mixed ATP and nucleoside/NMP standards.

| Mixed standards |             | Luminescence [RLU] | Difference | Relative [%] |
|-----------------|-------------|--------------------|------------|--------------|
| 0.4 mM ATP      | -           | 36550 ± 1086       | 0          | 100          |
| 0.4 mM ATP      | 0.4 mM dAdo | 33974 ± 81         | 2576       | 93           |
| 0.4 mM ATP      | 0.4 mM dCyd | 35335 ± 48         | 1215       | 97           |
| 0.4 mM ATP      | 0.4 mM dGuo | 35713 ± 617        | 837        | 98           |
| 0.4 mM ATP      | 0.4 mM Ado  | 35814 ± 433        | 735        | 98           |
| 0.4 mM ATP      | 0.4 mM Cyd  | 33791 ± 589        | 2759       | 92           |
| 0.4 mM ATP      | 0.4 mM Guo  | 35569 ± 0          | 981        | 97           |
| 0.4 mM ATP      | 0.4 mM Thd  | 36771 ± 766        | -221       | 101          |
| 0.4 mM ATP      | 0.4 mM Urd  | 35513 ± 397        | 1037       | 97           |
| 0.4 mM ATP      | 0.4 mM dAMP | 36406 ± 628        | 144        | 100          |
| 0.4 mM ATP      | 0.4 mM GMP  | 36152 ± 395        | 398        | 99           |
| 0.4 mM ATP      | 0.4 mM dGMP | 36897 ± 497        | -348       | 101          |
| 0.4 mM ATP      | 0.4 mM CMP  | 36188 ± 242        | 362        | 99           |
| 0.4 mM ATP      | 0.4 mM dCMP | 36271 ± 365        | 279        | 99           |
| 0.4 mM ATP      | 0.4 mM UMP  | 36299 ± 152        | 251        | 99           |
| 0.4 mM ATP      | 0.4 mM TMP  | 37048 ± 1412       | -499       | 101          |

Standards were manually prepared in NK reaction buffer. ATP/nucleoside standards were analyzed on one assay plate as triplicates. Mean and standard deviation are indicated.

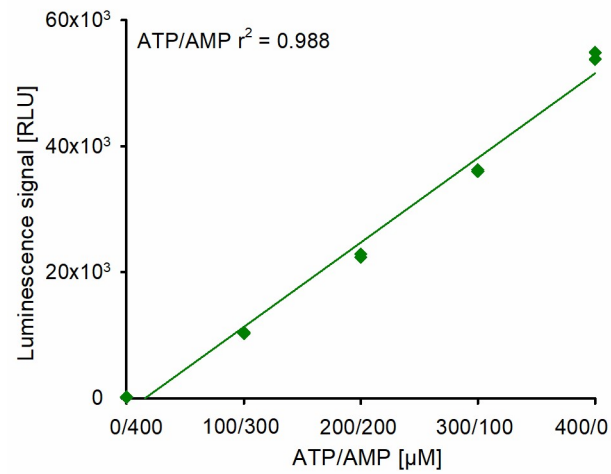

**Figure S1.** Mixed ATP/AMP standards. Standards were manually prepared in NK reaction buffer as independent duplicates and were also analyzed on different assay plates. Each standard was analyzed by the luminescent assay as duplicate.

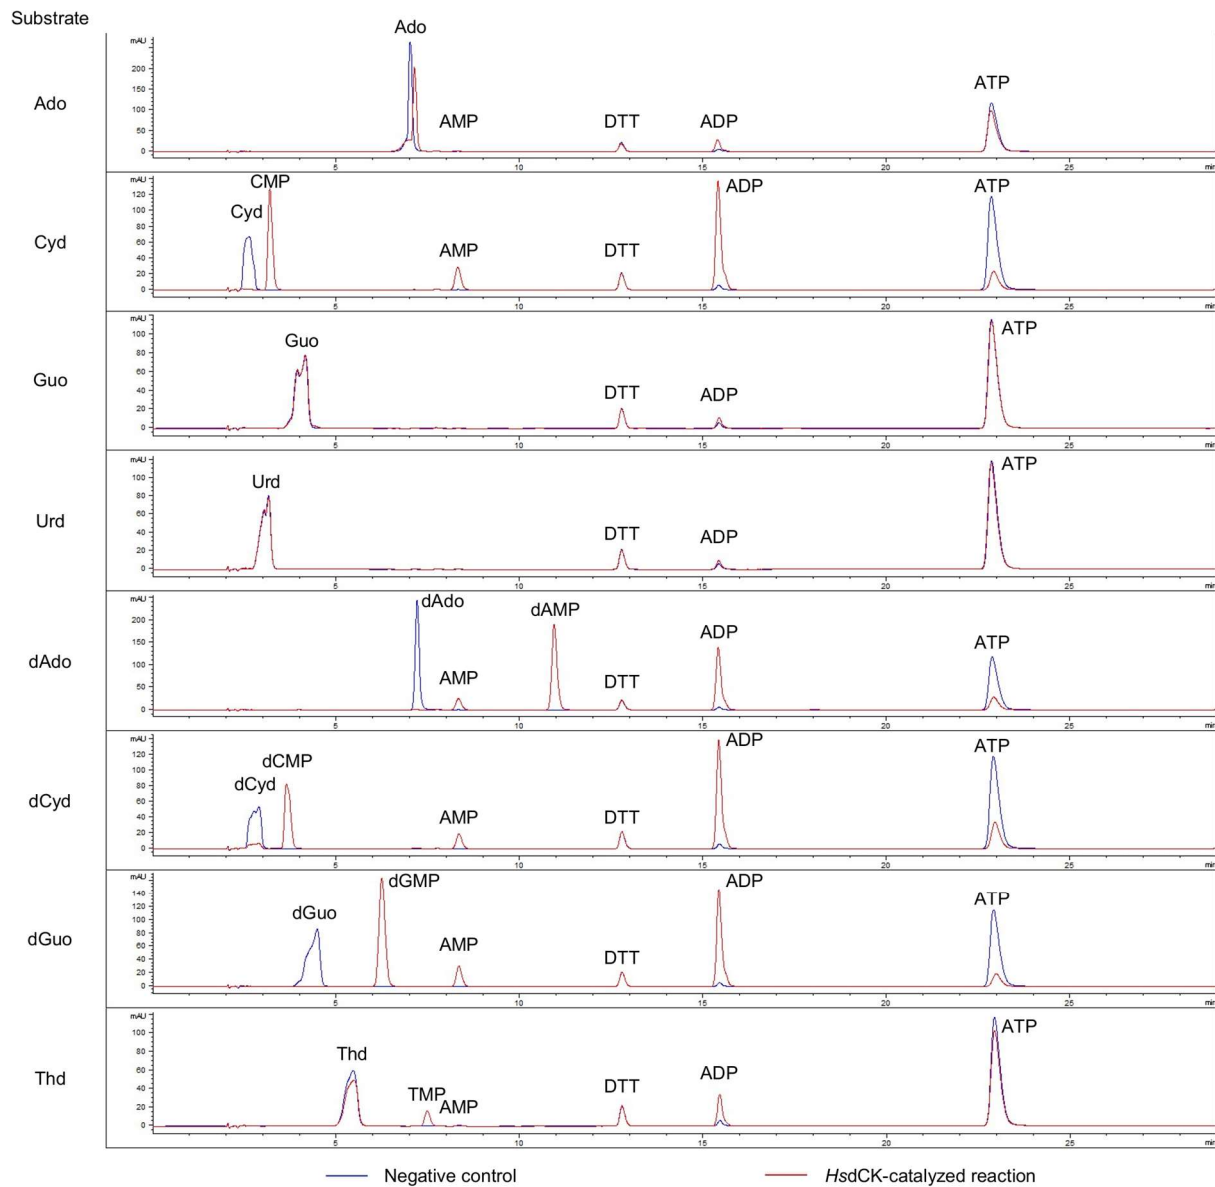

**Figure S2.** Exemplary HPLC chromatograms for *HsdCK*-catalyzed reactions with natural substrates.

**Table S2.** Comparison of HPLC and the luminescent assay for the determination of ATP consumption and (deoxy)NMP formation in *HsdCK*-catalyzed reactions.

|      | Luminescent assay |              | HPLC analysis    |                | Difference (Lum – HPLC) |                |
|------|-------------------|--------------|------------------|----------------|-------------------------|----------------|
|      | Consumed ATP [%]  | (d)NMP [%]   | Consumed ATP [%] | (deoxy)NMP [%] | Consumed ATP [%]        | (deoxy)NMP [%] |
| dAdo | 80.95 ± 3.95      | 96.20 ± 3.80 | 80.12 ± 4.11     | 99.23 ± 0.16   | 0.83                    | -3.03          |
| dCyd | 73.62 ± 0.93      | 88.34 ± 1.11 | 72.85 ± 0.78     | 83.98 ± 3.66   | 0.77                    | 4.36           |
| dGuo | 82.32 ± 2.13      | 98.11 ± 1.89 | 81.33 ± 2.25     | 99.26 ± 0.02   | 0.99                    | -0.49          |
| Ado  | 7.41 ± 0.15       | 8.90 ± 0.17  | 2.80 ± 0.01      | 1.37 ± 0.09    | 4.61                    | 7.53           |
| Cyd  | 82.64 ± 3.54      | 97.46 ± 2.54 | 83.25 ± 3.69     | 99.10 ± 0.90   | -0.60                   | -1.63          |
| Guo  | 3.81 ± 2.36       | 4.57 ± 2.83  | 0.52 ± 0.52      | 0.00 ± 0.00    | 3.29                    | 4.57           |
| Thd  | 13.15 ± 0.07      | 15.78 ± 0.08 | 11.06 ± 1.41     | 12.90 ± 0.05   | 2.08                    | 2.88           |
| Urd  | 3.90 ± 0.36       | 4.68 ± 0.43  | 0.00 ± 0.00      | 0.00 ± 0.00    | 3.90                    | 4.68           |

Reactions were manually prepared. Reactions consisting of 70 mM Tris [pH 7.6], 5 mM DTT, 10 mM MgCl<sub>2</sub>, 0.4 mM ATP, 1/3 mM substrate and 0.0002 U enzyme were prepared in a PCR plate to a final volume of 150 µL. After incubation at 37°C for 19 h, reactions were stopped by heat treatment at 75°C for 10 min. Each reaction was analyzed using the luminescent assay in triplicates. Each reaction was prepared as independent duplicates on different PCR plates and was also analyzed on different assay plates. Conversion percentages were calculated with consideration of the basal activities (without substrate) and the blanks (without ATP) in comparison to the negative controls (without enzyme).

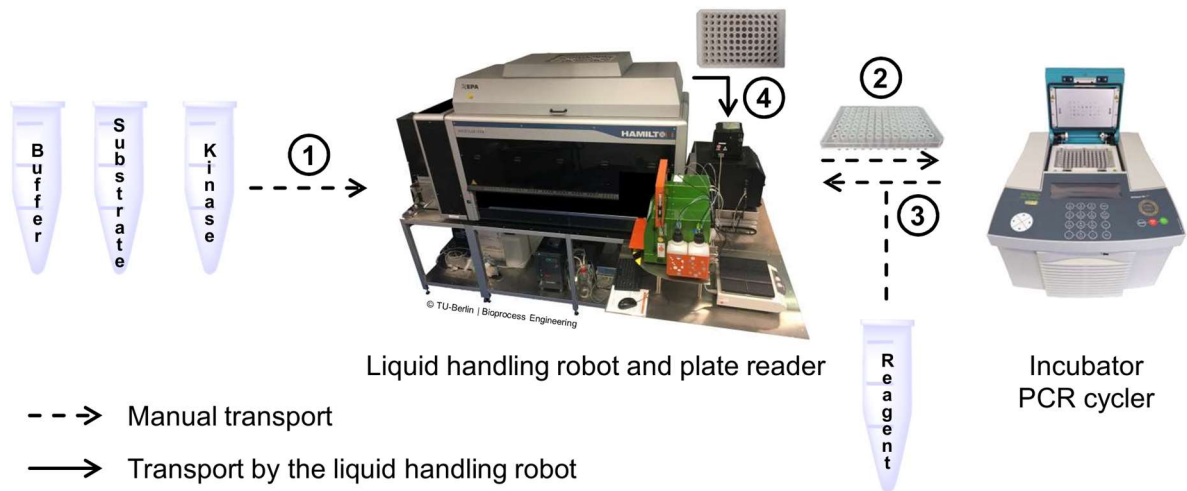

**Scheme S1.** Semi-automated substrate screening assay for nucleoside kinases. 1- Adding of kinase reaction components to the liquid handling robot and automatic preparation of the kinase reaction. 2- Manual transfer of the kinase reactions to an incubator / PCR cycle for reaction incubation and stop. 3- Manual transfer of the kinase reaction back to the liquid handling robot. Automatic preparation of the luciferase reaction. 4- Automatic transfer of the luciferase reaction to the plate reader. Measurement of the luminescence signal.

**Table S3.** Assay protocol.

| Step | Parameter                                                                             | Value                                                           | Description                                                                                                                                             |
|------|---------------------------------------------------------------------------------------|-----------------------------------------------------------------|---------------------------------------------------------------------------------------------------------------------------------------------------------|
| 1    | Deionized water                                                                       | 50 <sup>[a,b]</sup> , 70 <sup>[c]</sup> , 100 <sup>[d]</sup> µL | Add to PCR plate                                                                                                                                        |
| 2    | 5x Reaction buffer                                                                    | 30 µL                                                           | Add to PCR plate, final concentration 70 mM Tris HCl [pH 7.6], 10 mM MgCl <sub>2</sub> , 5 mM DTT, 0 mM <sup>[b]</sup> or 0.4 mM <sup>[a,c,d]</sup> ATP |
| 3    | Substrate                                                                             | 0 <sup>[b]</sup> , 50 <sup>[a,c,d]</sup> µL                     | Add to PCR plate, 1 mM stocks                                                                                                                           |
| 4    | Enzyme                                                                                | 0 <sup>[c]</sup> , 20 <sup>[a,b,d]</sup> µL                     | Add to PCR plate, prediluted stocks                                                                                                                     |
| 5    | Reaction time                                                                         | 19 h                                                            | At 37°C                                                                                                                                                 |
| 6    | Reaction stop                                                                         | 10 min                                                          | At 75°C, lid heat at 85°C                                                                                                                               |
| 7    | Deionized water                                                                       | 80 µl                                                           | Add to luminescence assay plate                                                                                                                         |
| 8    | Reaction mixture                                                                      | 10 µl                                                           | Transferred from PCR plate to luminescence assay plate                                                                                                  |
| 9    | Detection mixture                                                                     | 10 µl                                                           | Add to luminescence assay plate; Kinase-Glo reagent: prepared according to the manufacturer                                                             |
| 10   | Incubation time                                                                       | 10 min                                                          | At room temperature in the dark in BioTek Synergy Mx Microplate Reader                                                                                  |
| 11   | Assay readout                                                                         | Luminescence                                                    | BioTek Synergy Mx Microplate Reader                                                                                                                     |
| Step | Notes                                                                                 |                                                                 |                                                                                                                                                         |
|      | Volumes are for 96w plates.                                                           |                                                                 |                                                                                                                                                         |
| 1    | Liquid-handling robot: 8-tip dispense all wells                                       |                                                                 |                                                                                                                                                         |
| 2    | Liquid-handling robot: 1-tip dispense to wells according to pipetting protocol        |                                                                 |                                                                                                                                                         |
| 3    | Liquid-handling robot: 1-tip dispense to wells according to pipetting protocol        |                                                                 |                                                                                                                                                         |
| 4    | Liquid-handling robot: 1-tip dispense to wells according to pipetting protocol        |                                                                 |                                                                                                                                                         |
| 5    | Manual step: plates covered with sealing film and arched auto-sealing lids, transport |                                                                 |                                                                                                                                                         |
| 6    | Manual step: transport                                                                |                                                                 |                                                                                                                                                         |
| 7    | Liquid-handling robot: 8-tip dispense to wells according to pipetting protocol        |                                                                 |                                                                                                                                                         |
| 8    | Liquid-handling robot: 8-tip dispense to wells according to pipetting protocol        |                                                                 |                                                                                                                                                         |
| 9    | Liquid-handling robot: 8-tip dispense to wells according to pipetting protocol        |                                                                 |                                                                                                                                                         |
| 10   | Liquid-handling robot: transport to plate reader                                      |                                                                 |                                                                                                                                                         |
| 11   | Plate reader: Luminescence measurement, 1 s and extended dynamic range                |                                                                 |                                                                                                                                                         |

<sup>[a]</sup> kinase reaction, <sup>[b]</sup> substrate control, <sup>[c]</sup> negative control, <sup>[d]</sup> basal activity control (see materials and methods section)

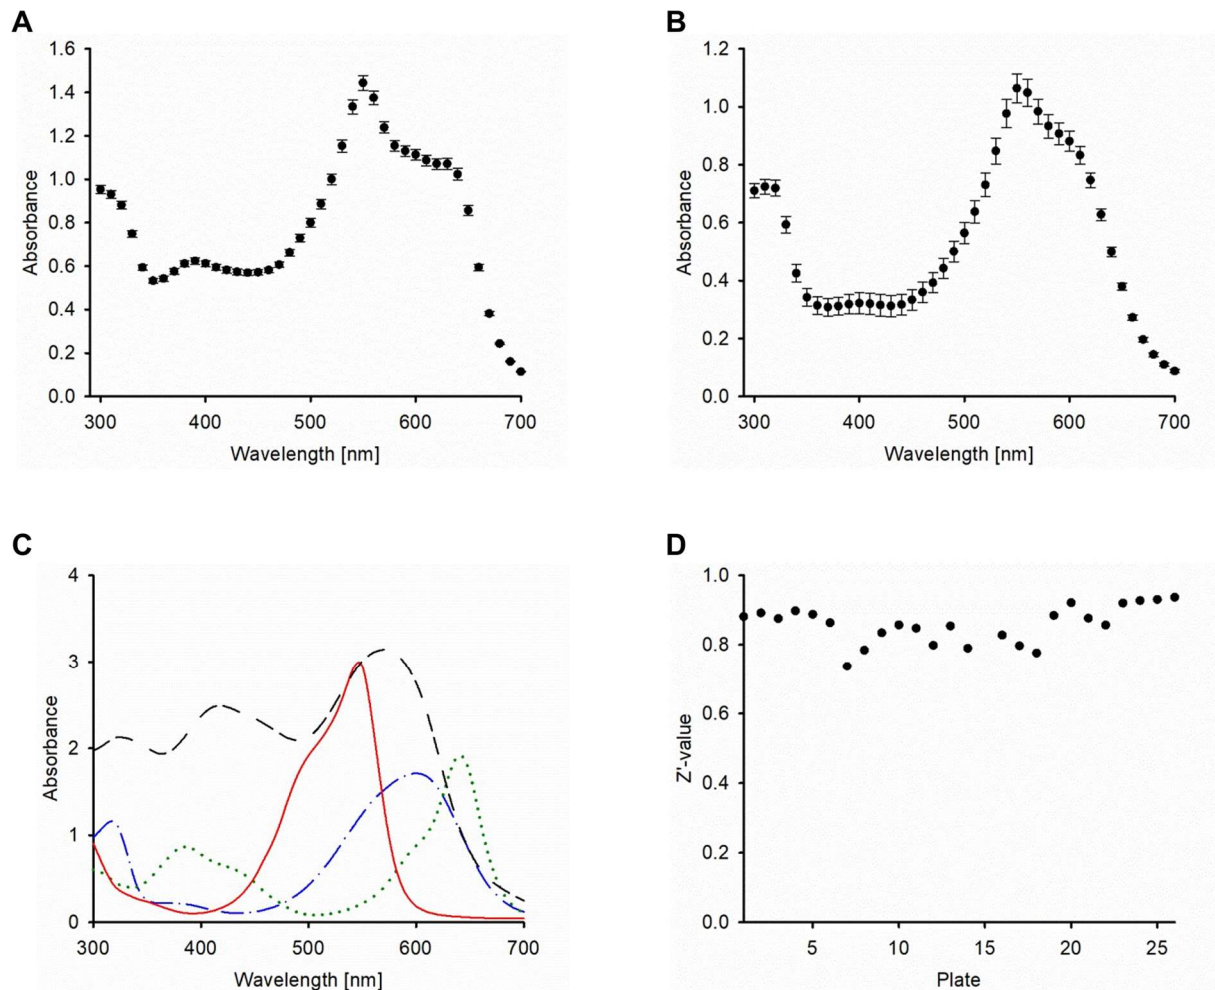

**Figure S3.** Accuracy of the NK activity assay. For the accuracy tests, the kinase reaction plate and the assay plates were prepared by a liquid-handling robot with colored-solutions. The differences in the absorbance between 300 nm and 700 nm were analyzed. Mean values and standard deviation are indicated. **(A)** The kinase reaction ( $n = 9$ ) was prepared in a PCR plate by combining blue (water), pink (buffer), green (substrate) and black (enzyme) dye dissolved in water. For the spectral scan, 100  $\mu$ L were manually transferred to an assay plate. The spectra of the controls are not shown. **(B)** The luminescent assay was prepared twice in assay plates ( $n = 186$ ) using blue (water), pink (kinase reaction) and black (Kinase-Glo reagent) dye dissolved in water. The spectra were directly measured. **(C)** The spectra of the colored-solutions blue (dashed-dotted), green (dotted), black (dashed) and pink (solid). **(D)** The Z'-values of the luminescent assay for all manually (Plate No. 1-8) and semi-automated (Plate No. 9-26) prepared plates. The Z'-values were calculated with the negative and substrate controls.



**Table S4.** Activities of four (deoxy)nucleoside kinases with 20 natural (upper part) and modified nucleoside substrates (lower part) were determined using the semi-automated high-throughput NK assay. Conversion percentages [%] were determined in duplicates using the established luciferase assay. Mean values and standard deviations (+/-) are shown.

|                                                    | <i>HsdCK</i> | <i>HsAK</i>               | <i>TK</i>               | <i>DmdNK</i>              |
|----------------------------------------------------|--------------|---------------------------|-------------------------|---------------------------|
| 2'-deoxyadenosine                                  | 96.2 ± 3.8   | 18.3 ± 2.2 <sup>[a]</sup> | 8.7 ± 8.7               | 91.8 ± 8.2                |
| 2'-deoxycytidine                                   | 88.3 ± 1.1   | 2.3 ± 1.8                 | 25.4 ± 6.1              | 95.4 ± 4.6                |
| 2'-deoxyguanosine                                  | 98.1 ± 1.9   | 0.4 ± 0.4                 | 18.3 ± 13.9             | 92.9 ± 0.2                |
| adenosine                                          | 8.9 ± 0.2    | 83.0 ± 3.8 <sup>[a]</sup> | 0.0 ± 0.0               | 7.2 ± 0.9                 |
| cytidine                                           | 97.5 ± 2.5   | 1.4 ± 1.4                 | 4.0 ± 4.0               | 70.4 ± 5.8                |
| guanosine                                          | 4.6 ± 2.8    | 0.0 ± 0.0                 | 10.1 ± 7.8              | 9.9 ± 6.5                 |
| thymidine                                          | 15.8 ± 0.1   | 0.1 ± 0.1                 | 88.0 ± 2.5              | 91.6 ± 0.1                |
| uridine                                            | 4.7 ± 0.4    | 0.5 ± 0.5                 | 35.1 ± 7.5              | 43.8 ± 0.2                |
| gemcitabine                                        | 85.7 ± 1.8   | 4.3 ± 2.6                 | 9.6 ± 3.0               | 78.7 ± 1.2                |
| vidarabine                                         | 72.0 ± 0.7   | 4.2 ± 3.9 <sup>[a]</sup>  | 3.2 ± 1.0               | 8.0 ± 3.0                 |
| ganciclovir                                        | 0.0 ± 0.0    | 0.0 ± 0.0                 | 25.3 ± 1.5              | 0.0 ± 0.0                 |
| 1-(2'-deoxy-2'-fluoro-β-D-arabinofuranosyl) uracil | 19.6 ± 5.9   | 0.0 ± 0.0                 | 31.0 ± 0.4              | 67.2 ± 8.9                |
| 5-fluorocytidine                                   | 81.8 ± 1.9   | 5.4 ± 5.4                 | 6.3 ± 4.5               | 78.8 ± 1.3 <sup>[c]</sup> |
| 5-ethynyl-2'-deoxyuridine                          | 0.0 ± 0.0    | 0.8 ± 0.8                 | 83.0 ± 17.0             | 56.4 ± 12.7               |
| lamivudine                                         | 46.4 ± 2.0   | 0.0 ± 0.0                 | 3.2 ± 0.6               | 23.9 ± 1.6                |
| acyclovir                                          | 0.0 ± 0.0    | 2.2 ± 2.2                 | 28 ± 4.5 <sup>[b]</sup> | 0.0 ± 0.0                 |
| clofarabine                                        | 84.2 ± 5.8   | 1.8 ± 1.3                 | 8.1 ± 6.8               | 61.0 ± 7.4                |
| cladribine                                         | 80.6 ± 1.0   | 4.1 ± 3.0                 | 8.4 ± 1.9               | 67.0 ± 5.6                |
| fludarabine                                        | 76.3 ± 2.6   | 0.0 ± 0.0                 | 5.9 ± 3.7               | 20.7 ± 1.6                |
| 2-fluoroadenosine                                  | 46.2 ± 2.7   | 75.4 ± 3.2 <sup>[a]</sup> | 0.8 ± 0.8               | 19.7 ± 9.8 <sup>[c]</sup> |

Reactions consisting of 70 mM Tris [pH 7.6], 5 mM DTT, 10 mM MgCl<sub>2</sub>, 0.4 mM ATP, 1/3 mM substrate and 0.0002 U enzyme were prepared in a PCR plate to a final volume of 150 µL. After incubation at 37°C for 19 h, reactions were stopped by heat treatment at 75°C for 10 min. Each reaction was analyzed by the luminescent assay in triplicates. Each reaction was prepared as independent duplicates on different PCR plates and was also analyzed on different assay plates. Conversion percentages were calculated with consideration of the basal activities (without substrate) and the blanks (without ATP) in comparison to the negative controls (without enzyme).

<sup>[a]</sup> The reaction buffer contained 50 mM KCl and 0.004 U enzyme. <sup>[b]</sup> An enzyme concentration of 0.0012 U was applied. <sup>[c]</sup> An enzyme concentration of 0.004 U was applied.

**Table S5.** Typical retention times for the HPLC analysis.

| Compound                           | Retention time [min] |
|------------------------------------|----------------------|
| adenosine                          | 7.0                  |
| adenosine 5'-monophosphate         | 8.2                  |
| adenosine 5'-diphosphate           | 15.4                 |
| adenosine 5'-triphosphate          | 22.9                 |
| 2'-deoxyadenosine                  | 7.1                  |
| 2'-deoxyadenosine 5'-monophosphate | 11.0                 |
| guanosine                          | 4.0                  |
| guanosine 5'-monophosphate         | 4.6                  |
| 2'-deoxyguanosine                  | 4.4                  |
| 2'-deoxyguanosine 5'-monophosphate | 6.2                  |
| cytidine                           | 2.7                  |
| cytidine 5'-monophosphate          | 3.2                  |
| 2'-deoxycytidine                   | 2.9                  |
| 2'-deoxycytidine 5'-monophosphate  | 3.8                  |
| uridine                            | 3.0                  |
| uridine 5'-monophosphate           | 3.6                  |
| thymidine                          | 5.5                  |
| thymidine 5'-monophosphate         | 7.4                  |

Samples were analyzed by HPLC-DAD at 260 nm using a reversed-phase column. The flow rate was set to 1 mL min<sup>-1</sup> at 34°C. The gradient consisted of A (KH<sub>2</sub>PO<sub>4</sub>/K<sub>2</sub>HPO<sub>4</sub>: 0.1 M, tetrabutylammonium bisulfate: 8 mM, pH 5.4) and B (70 % A, 30 % MeOH): 0 min – 80 % A, 4 min – 80 % A, 14 min – 40 % A, 35 min – 36.5 % A, 35.5 min – 80 % A and 38 min – 80 % A.

## References

- [1] A. Brand, L. Allen, M. Altman, M. Hlava, J. Scott, *Learn Publ* **2015**, 28, 151–155.
- [2] K. F. Hellendahl, M. Fehlau, *Zenodo* **2021**, DOI  
<https://doi.org/10.5281/zenodo.5363311>.
